# Supplementary material
Source: Springer Nature journal article supplement (https://www.springermedizin.de/resource/supplementary/12957_2010_815_MOESM1_ESM.pdf/9565918)

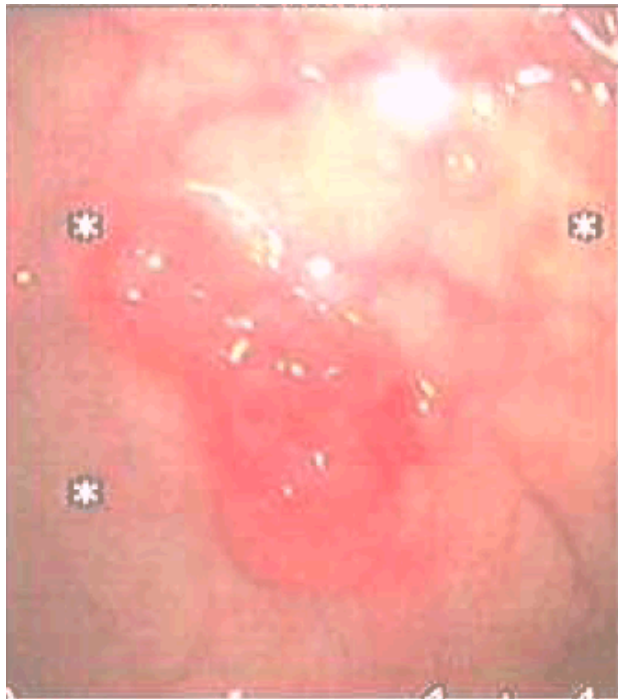

Supplement: MOESM1 [file 9565918]
